# Supplementary material for: Investigating the Influence of Assessment Question Framing on Undergraduate Biology Student Preference and Affect
Source: Atypon-hosted journal article supplement (doi:10.1187/cbe.22-12-0249), 2023-10-10
Supplement: combinedsupmats.pdf [file combinedsupmats.pdf]

# Supplemental Material

*CBE—Life Sciences Education*

Hsu *et al.*

**Supporting information for Hsu *et al.*, “Investigating the influence of assessment question framing on undergraduate biology student preference and affect”**

**Table of contents**

**Supplemental tables...** pages 3-7

**ANOVA results...** page 8

**End of semester survey...** page 9

**Supplemental table 1.** Demographic data for the three sections. No students identified as non-binary. Given that students could select more than box for race or ethnicity, the percents sum up to greater than 100%.

| Section | Number participating (percent of class) | Gender                      | Major                                                                                                                                                                             | Class year                                                                          | Percent first-generation students | Percent transfer students | Race or ethnicity                                                                         |
|---------|-----------------------------------------|-----------------------------|-----------------------------------------------------------------------------------------------------------------------------------------------------------------------------------|-------------------------------------------------------------------------------------|-----------------------------------|---------------------------|-------------------------------------------------------------------------------------------|
| 1       | 29 (53.7%)                              | 69.0% female;<br>31.0% male | 44.8% Health Sciences;<br>17.2% Applied Human Physiology;<br>17.2% pre-pharmacy;<br>13.8% Biochemistry;<br>6.9% Biology                                                           | 69.0% first years;<br>13.7% second years;<br>17.2% third years;<br>0% fourth years  | 17.2%                             | 10.7%                     | 51.7% Asian;<br>51.7% White;<br>6.9% LatinX;<br>3.4% Black                                |
| 2       | 51 (92.7%)                              | 90.2% female;<br>9.8% male  | 38% pre-pharmacy;<br>30% Health Sciences;<br>12% Biochemistry;<br>8% Applied Human Physiology;<br>6% Chemistry;<br>2% Biology;<br>2% Environmental Science and Policy;<br>2% Math | 78.4% first years;<br>15.7% second years;<br>3.9% third years;<br>1.9% fourth years | 17.6%                             | 5.8%                      | 56.9% Asian;<br>29.4% White;<br>15.7% LatinX;<br>2.0% Native Hawaiian or Pacific Islander |
| 3       | 42 (79.3%)                              | 71.4% female;<br>28.6% male | 50.0% Health sciences;<br>14.3% pre-pharmacy;<br>16.7% Biochemistry;<br>11.9% Biology;<br>7.1% Applied Human Physiology                                                           | 73.8% first years;<br>9.5% second years;<br>11.9% third years;<br>4.8% fourth years | 29.3%                             | 14.3%                     | 47.6% Asian;<br>45.2% White;<br>26.2% LatinX                                              |

**Supplemental table 2.** Student performance across section and assessments; quiz and exam scores are reported as percents, given that the relative point values differed between these. The mean percent is reported with standard deviation in parentheses.

|               | <b>Section 1</b> | <b>Section 2</b> | <b>Section 3</b> |
|---------------|------------------|------------------|------------------|
| <b>Quiz 1</b> | 79.7% (15.7%)    | 80.8% (17.7%)    | 79.1% (13.8%)    |
| <b>Exam 1</b> | 78.2% (19.1%)    | 81.0% (15.0%)    | 80.4% (14.5%)    |
| <b>Quiz 2</b> | 73.7% (20.1%)    | 77.4% (17.0%)    | 75.5% (18.0%)    |
| <b>Exam 2</b> | 69.0% (19.1%)    | 75.7% (18.6%)    | 73.5% (17.0%)    |
| <b>Quiz 3</b> | 70.0% (18.0%)    | 78.8% (16.0%)    | 75.4% (16.7%)    |

**Supplemental table 3.** Means for sense of belonging and identity reflection in beginning of semester baseline survey.

| <b>Section number</b> | <b>Sense of belonging</b> | <b>Identity reflection</b> |
|-----------------------|---------------------------|----------------------------|
| 1                     | 4.03 (0.68)               | 3.75 (0.64)                |
| 2                     | 3.76 (0.81)               | 3.41 (0.82)                |
| 3                     | 3.76 (0.82)               | 3.45 (0.80)                |

**Supplemental table 4.** Average scores for stress by section (standard deviation in parentheses).

| <b>Section number</b> | <b>Assessment framing variant</b> | <b>Quiz 1</b> | <b>Exam 1</b> | <b>Quiz 2</b> | <b>Exam 2</b> | <b>Quiz 3</b> |
|-----------------------|-----------------------------------|---------------|---------------|---------------|---------------|---------------|
| 1                     | Authentic                         | 2.41 (0.97)   | 2.62 (1.21)   | 2.48 (0.99)   | 2.20 (0.96)   | 2.83 (1.06)   |
| 2                     | Self-referential                  | 2.43 (0.91)   | 2.33 (0.89)   | 2.60 (1.0)    | 2.30 (1.04)   | 2.50 (0.98)   |
| 3                     | Classmate referential             | 2.57 (0.99)   | 2.61 (0.95)   | 2.54 (0.89)   | 2.52 (0.88)   | 2.72 (0.90)   |

**Supplemental table 5.** Average scores for identity by section (standard deviation in parentheses)

| <b>Section number</b> | <b>Assessment framing variant</b> | <b>Quiz 1</b> | <b>Exam 1</b> | <b>Quiz 2</b> | <b>Exam 2</b> | <b>Quiz 3</b> |
|-----------------------|-----------------------------------|---------------|---------------|---------------|---------------|---------------|
| 1                     | Authentic                         | 3.57 (0.84)   | 3.61 (0.74)   | 3.49 (0.72)   | 3.45 (0.66)   | 3.77 (0.66)   |
| 2                     | Self-referential                  | 3.38 (0.88)   | 3.57 (0.77)   | 3.47 (0.80)   | 3.45 (0.66)   | 3.54 (0.67)   |
| 3                     | Classmate referential             | 3.60 (0.81)   | 3.75 (0.80)   | 3.48 (0.77)   | 3.41 (0.85)   | 3.60 (0.82)   |

**Supplemental table 6.** Average scores for stress by preferred variant (standard deviation in parentheses).

| <b>Assessment framing variant preference</b> | <b>Quiz 1</b> | <b>Exam 1</b> | <b>Quiz 2</b> | <b>Exam 2</b> | <b>Quiz 3</b> |
|----------------------------------------------|---------------|---------------|---------------|---------------|---------------|
| Authentic                                    | 2.80 (0.16)   | 2.75 (0.16)   | 2.88 (0.19)   | 2.56 (0.20)   | 2.80 (0.18)   |
| Self-referential                             | 2.37 (0.09)   | 2.37 (0.09)   | 2.48 (0.10)   | 2.20 (0.09)   | 2.49 (0.09)   |
| Classmate referential                        | 3.00 (0.24)   | 2.82 (0.14)   | 2.90 (0.14)   | 2.61 (0.20)   | 2.61 (0.17)   |

**Supplemental table 7.** Average scores for identity by preferred variant (standard deviation in parentheses)

| <b>Assessment framing variant preference</b> | <b>Quiz 1</b> | <b>Exam 1</b> | <b>Quiz 2</b> | <b>Exam 2</b> | <b>Quiz 3</b> |
|----------------------------------------------|---------------|---------------|---------------|---------------|---------------|
| Authentic                                    | 3.70 (0.10)   | 3.64 (0.07)   | 3.50 (0.07)   | 3.41 (0.09)   | 3.66 (0.08)   |
| Self-referential                             | 3.51 (0.06)   | 3.66 (0.04)   | 3.55 (0.04)   | 3.52 (0.04)   | 3.72 (0.04)   |
| Classmate referential                        | 3.88 (0.16)   | 3.95 (0.08)   | 3.74 (0.08)   | 3.52 (0.10)   | 3.81 (0.10)   |

**Supplemental table 8.** Code frequencies for students' reasoning for why they preferred a certain variant, separated by student preferences. Only codes at 5% or more frequency in at least one of the sections are included.

| <b><u>Code name</u></b>             | <b><u>Percent of responses from students preferring authentic variant</u></b> | <b><u>Percent of responses from students preferring self-referential variant</u></b> | <b><u>Percent of responses from students preferring classmate referential variant</u></b> |
|-------------------------------------|-------------------------------------------------------------------------------|--------------------------------------------------------------------------------------|-------------------------------------------------------------------------------------------|
| Easy to read                        | 30.0%                                                                         | 54.7%                                                                                | 16.7%                                                                                     |
| Visualization                       | 25.0%                                                                         | 25.0%                                                                                | 25.0%                                                                                     |
| Less complexity is good             | 0%                                                                            | 10.0%                                                                                | 26.6%                                                                                     |
| Fewer words                         | 10.0%                                                                         | 26.6%                                                                                | 8.3%                                                                                      |
| Identity                            | 0%                                                                            | 12.5%                                                                                | 33.3%                                                                                     |
| Distraction due to names            | 0%                                                                            | 12.5%                                                                                | 0%                                                                                        |
| No preferences or major differences | 5.0%                                                                          | 0%                                                                                   | 0%                                                                                        |
| More complexity is good             | 25.0%                                                                         | 0%                                                                                   | 8.3%                                                                                      |
| Authentic                           | 25.0%                                                                         | 0%                                                                                   | 0%                                                                                        |
| Similarity to past exams            | 15.0%                                                                         | 1.6%                                                                                 | 8.3%                                                                                      |
| Stereotype threat                   | 5.0%                                                                          | 0%                                                                                   | 16.7%                                                                                     |

**Supplemental table 9.** Code frequencies for students' reasoning for why they least preferred a certain variant, separated by student preferences. Only codes at 5% or more frequency in at least one of the sections are included.

| <b><u>Code name</u></b>                 | <b><u>Percent of responses from students preferring authentic variant</u></b> | <b><u>Percent of responses from students preferring self-referential variant</u></b> | <b><u>Percent of responses from students preferring classmate referential variant</u></b> |
|-----------------------------------------|-------------------------------------------------------------------------------|--------------------------------------------------------------------------------------|-------------------------------------------------------------------------------------------|
| More complexity is bad                  | 47.3%                                                                         | 0%                                                                                   | 31.3%                                                                                     |
| Length                                  | 19.1%                                                                         | 0%                                                                                   | 50.0%                                                                                     |
| Less authentic                          | 7.1%                                                                          | 13.3%                                                                                | 28.1%                                                                                     |
| No preferences or major changes         | 0%                                                                            | 0%                                                                                   | 0%                                                                                        |
| Distraction due to names                | 14.3%                                                                         | 0%                                                                                   | 12.5%                                                                                     |
| Intimidation of real study or scientist | 19.1%                                                                         | 0%                                                                                   | 0%                                                                                        |
| Less connected (identity)               | 11.9%                                                                         | 6.7%                                                                                 | 3.1%                                                                                      |
| Hard to visualize                       | 0%                                                                            | 26.7%                                                                                | 6.3%                                                                                      |
| Similarity to class and past exams      | 2.4%                                                                          | 6.7%                                                                                 | 0%                                                                                        |
| Stereotype threat                       | 0%                                                                            | 13.3%                                                                                | 0%                                                                                        |
| Less complexity is bad                  | 0%                                                                            | 6.7%                                                                                 | 0%                                                                                        |



## ANOVA results

| ANOVA comparison                                      | df (between groups, within groups) | F value | Sig   |
|-------------------------------------------------------|------------------------------------|---------|-------|
| Quiz 1 across the three sections                      | 2, 112                             | 0.12    | 0.88  |
| Exam 1 across the three sections                      | 2, 112                             | 0.28    | 0.75  |
| Quiz 2 across the three sections                      | 2, 112                             | 0.36    | 0.70  |
| Exam 2 across the three sections                      | 2, 112                             | 1.22    | 0.30  |
| Quiz 3 across the three sections                      | 2, 112                             | 2.54    | 0.08  |
| Combined assessment scores across the three sections. | 2, 112                             | 0.90    | 0.41  |
| Beginning of semester survey, stress                  | 2, 149                             | 1.39    | 0.25  |
| Beginning of semester survey, identity                | 2, 149                             | 2.30    | 0.11  |
| During semester surveys, stress, quiz 1               | 2, 259                             | 0.70    | 0.50  |
| During semester surveys, stress, exam 1               | 2, 243                             | 2.4     | 0.09  |
| During semester surveys, stress, quiz 2               | 2, 215                             | 0.30    | 0.77  |
| During semester surveys, stress, exam 2               | 2, 221                             | 2.2     | 0.12  |
| During semester surveys, stress, quiz 3               | 2, 201                             | 2.0     | 0.14  |
| During semester surveys, identity, quiz 1             | 2, 381                             | 2.9     | 0.059 |
| During semester surveys, identity, exam 1             | 2, 732                             | 4.1     | 0.018 |
| During semester surveys, identity, quiz 2             | 2, 651                             | 0.05    | 0.95  |
| During semester surveys, identity, exam 2             | 2, 669                             | 0.26    | 0.77  |
| During semester surveys, identity, quiz 3             | 2, 608                             | 4.5     | 0.012 |

### End of semester survey

1. Please read the three versions of the same question above. After reading all three versions, which of these versions would you prefer when taking a quiz/exam?

*[Choices: version A, version B, and version C; students were provided the three examples listed in table 1]*

2. Explain your reasoning for which choice you would most prefer when taking a quiz or exam. Please be as detailed as possible.

3. Which of these versions would you **LEAST** prefer when taking a quiz/exam?

*[Choices: version A, version B, and version C]*

4. Explain your reasoning for which choice you would **LEAST** prefer when taking a quiz or exam. Please be as detailed as possible.
